# Supplementary material
Source: PubMed Central journal article supplement (PMC5137783)
Supplement: NIHMS70516-supplement-Supplementary_Table.pdf [file NIHMS70516-supplement-Supplementary_Table.pdf]

| <b>Primer name</b> | <b>Primer location</b> | <b>Primer Sequence 5'–3'</b>                          | <b>Annealing temperature (°C)</b> | <b>Product size (bp)</b> |
|--------------------|------------------------|-------------------------------------------------------|-----------------------------------|--------------------------|
| G2-1F              | Intron 3–4             | <b>TGTAAAACGACGGCCAGT</b> GAGCGAGACATCACCCATCCC       | 61                                | 598                      |
| G2-1R              | Exon 3                 | <b>CAGGAAACAGCTATGAC</b> CCCCCTGGAGGCCCACTCTCTG       |                                   |                          |
| G2-2F              | Intron 5–6             | <b>TGTAAAACGACGGCCAGT</b> CTTCCCAAGCCAAAGCCCAAGC      | 59                                | 253                      |
| G2-2R              | Intron 4–5 & Exon 5    | <b>CAGGAAACAGCTATGAC</b> CCCTGCCTTGCCCTCCCAAGTC       |                                   |                          |
| G2-3F              | Exon 6                 | <b>TGTAAAACGACGGCCAGT</b> TAACTGCTGGCAGGCTGCTG        | 59.5                              | 584                      |
| G2-3R              | Intron 5–6             | <b>CAGGAAACAGCTATGAC</b> CCAGTGGGACACAATTCCTGG        |                                   |                          |
| G2-4F              | Exon 5 & Intron 5–6    | <b>TGTAAAACGACGGCCAGT</b> CGCAGTCCACTCACATTGTGCAGCTTG | 59.5                              | 593                      |
| G2-4R              | Intron 4–5             | <b>CAGGAAACAGCTATGAC</b> CCGGACACTGACTCACCCAGGA       |                                   |                          |

G2-1, G2-2, G2-3 and G2-4 primers were used to PCR amplify and sequence the *GATA2* mutations in patients 1,2,3 and 4 respectively. Shown are the primer names, location and specific conditions used to amplify each product. The M13 tag used for all the primers is in bold. Primers are also described on the NCBI probe assembly (<http://www.ncbi.nlm.nih.gov/projects/genome/prob>).
